# Supplementary material
Source: PubMed Central journal article supplement (PMC6151153)

# Supplemental Figure 3

**A**

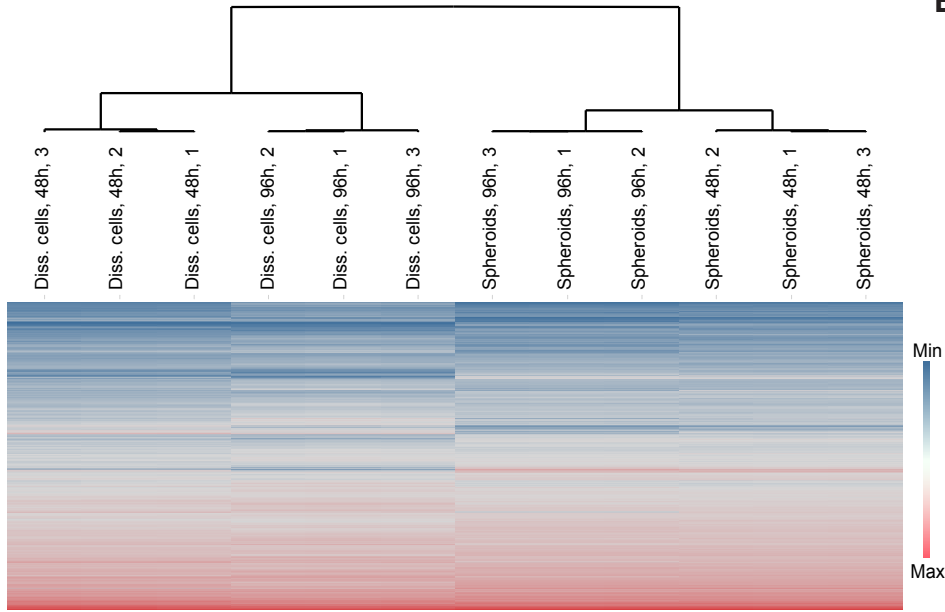

**B**

| Hallmark gene sets                             |
|------------------------------------------------|
| <b>Enriched in spheroids at 48 hours (FDR)</b> |
| Epithelial-mesenchymal transition (0%)         |
| Coagulation (0.042%)                           |
| <b>Enriched in spheroids at 96 hours (FDR)</b> |
| Interferon alpha response (0%)                 |
| E2F targets (3.9%)                             |

**C**

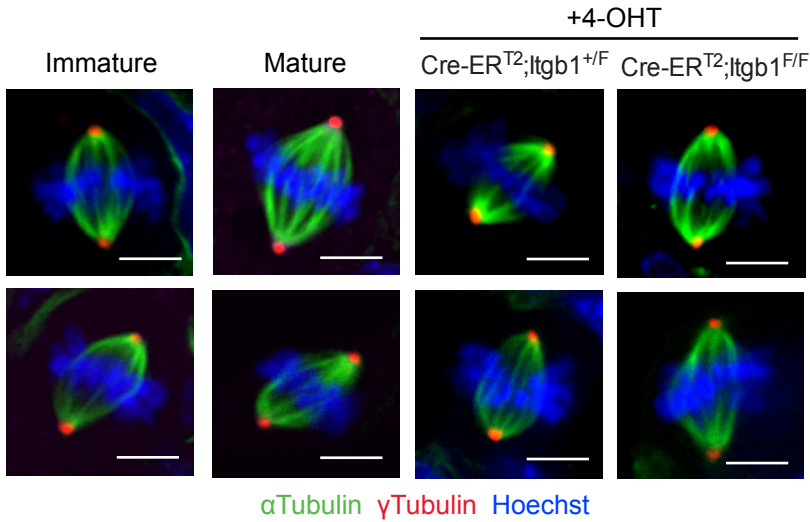

**E**

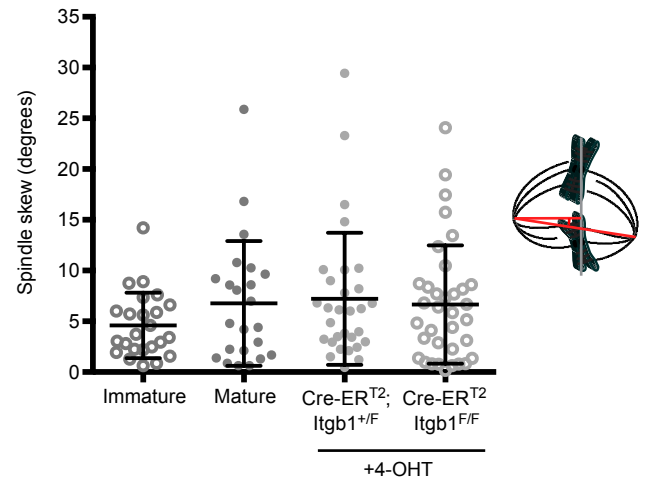

**D**

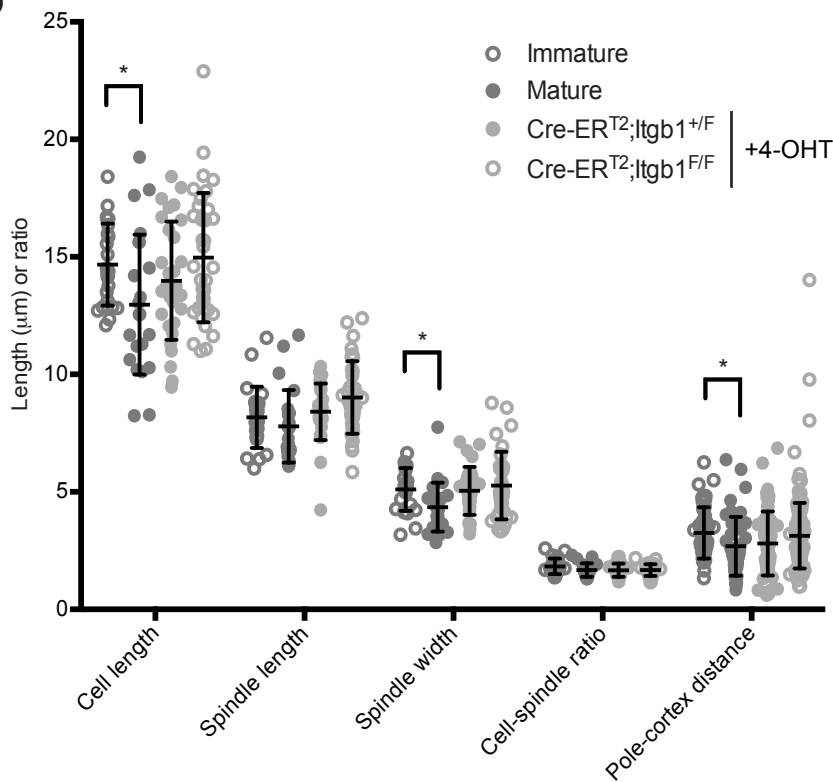

**F**

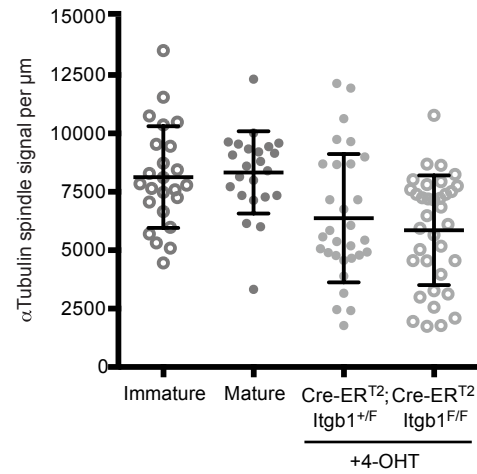

Supplement: NIHMS1502225-supplement-7.pdf [file NIHMS1502225-supplement-7.pdf]
