# Supplementary material
Source: PubMed Central journal article supplement (PMC6151153)

# Supplemental Figure 1

**A**

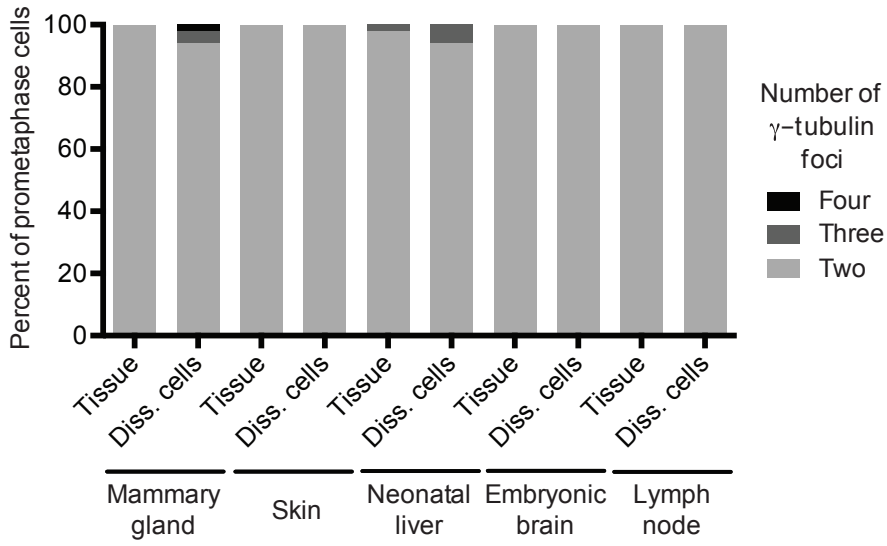

**B**

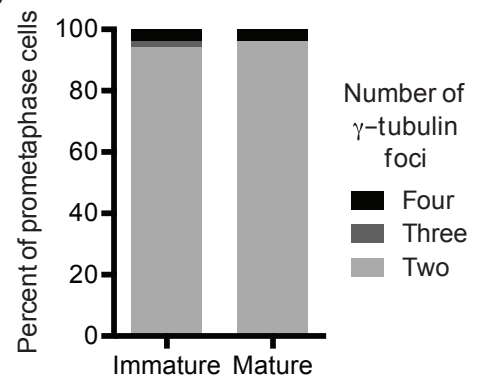

Supplement: NIHMS1502225-supplement-5.pdf [file NIHMS1502225-supplement-5.pdf]

# Supplemental Figure 2

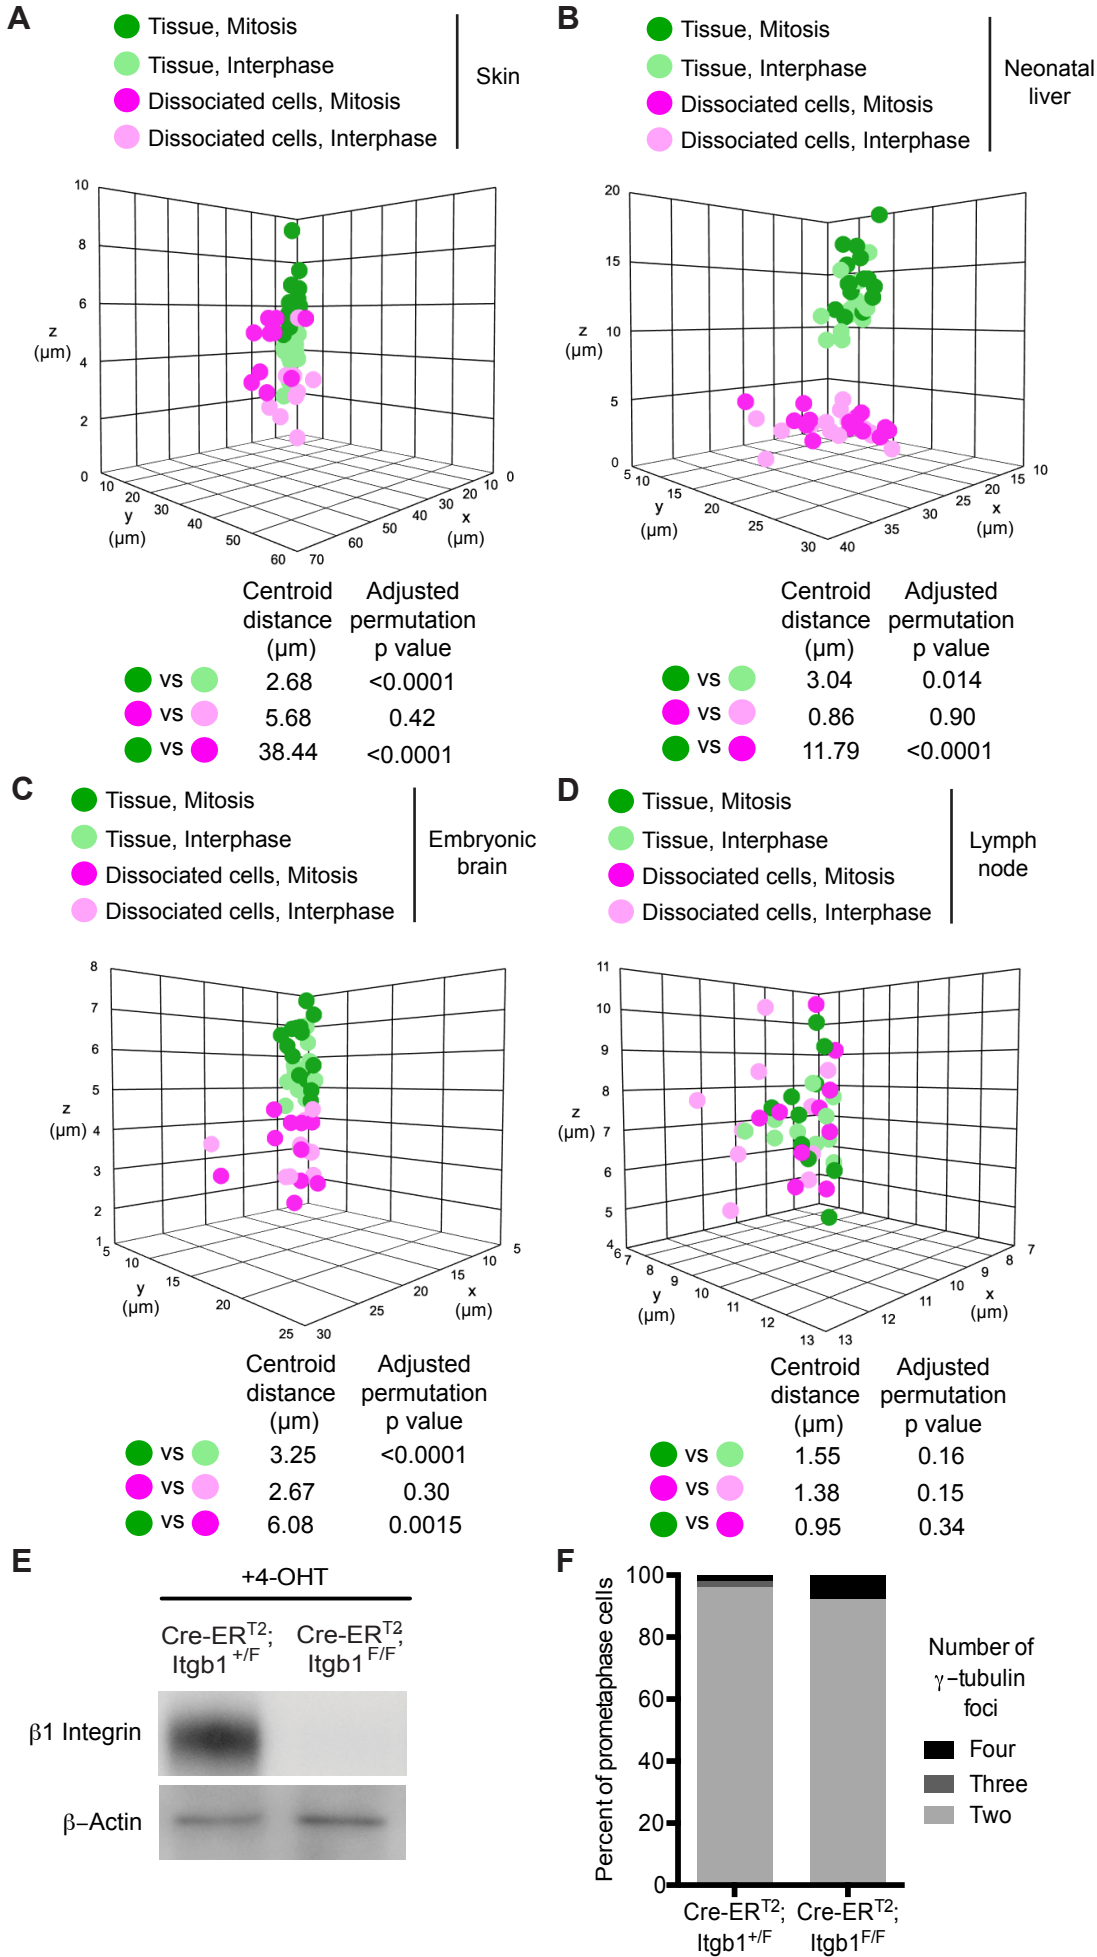

Supplement: NIHMS1502225-supplement-6.pdf [file NIHMS1502225-supplement-6.pdf]

# Supplemental Figure 4

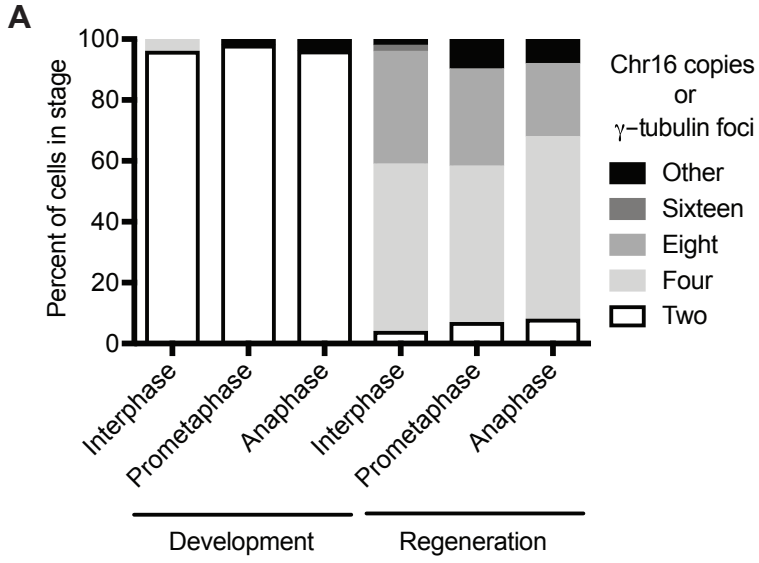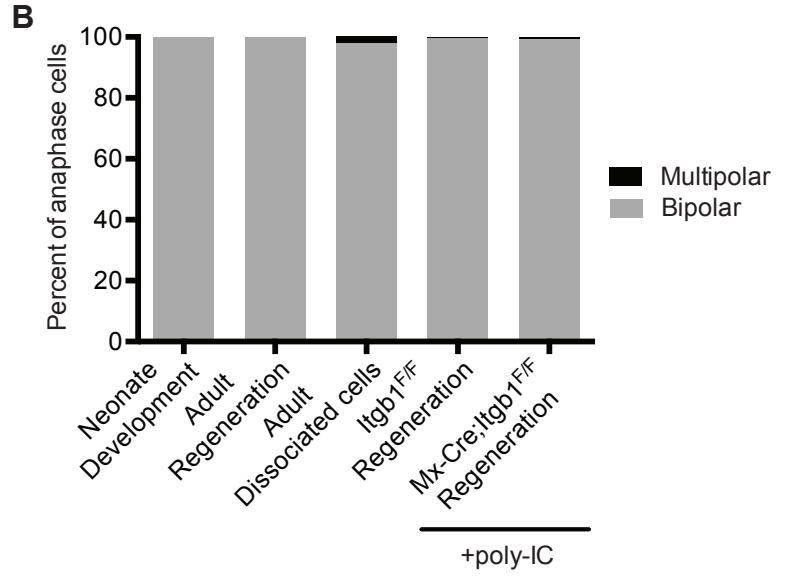

Supplement: NIHMS1502225-supplement-8.pdf [file NIHMS1502225-supplement-8.pdf]
